# Supplementary material for: Enhancement of the antimicrobial activity of cinnamon essential oil-loaded electrospun nanofilm by the incorporation of lysozyme
Source: Royal Society of Chemistry journal article supplement (doi:10.1039/c6ra25977d), 2017-01-01
Supplement: c6ra25977d1.pdf [file c6ra25977d1.pdf]

## **Supporting Information**

### **Enhancement of antimicrobial activity of cinnamon essential oil-loaded electrospun nanofilm by incorporation of lysozyme**

Kun. Feng,<sup>a</sup> Peng. Wen,<sup>a</sup> Huan. Yang,<sup>a</sup> Ning. Li,<sup>a</sup> Wen Y. Lou,<sup>a</sup> Min H. Zong,<sup>a</sup> and Hong. Wu<sup>\*a,b</sup>

<sup>1</sup> School of Food Science and Engineering, South China University of Technology,

Guangzhou 510640, China

<sup>2</sup>Guangdong Province Key Laboratory for Green Processing of Natural Products and

Product Safety, Guangzhou 510640, China

\*E-mail: bbhwu@scut.edu.cn (H. Wu)

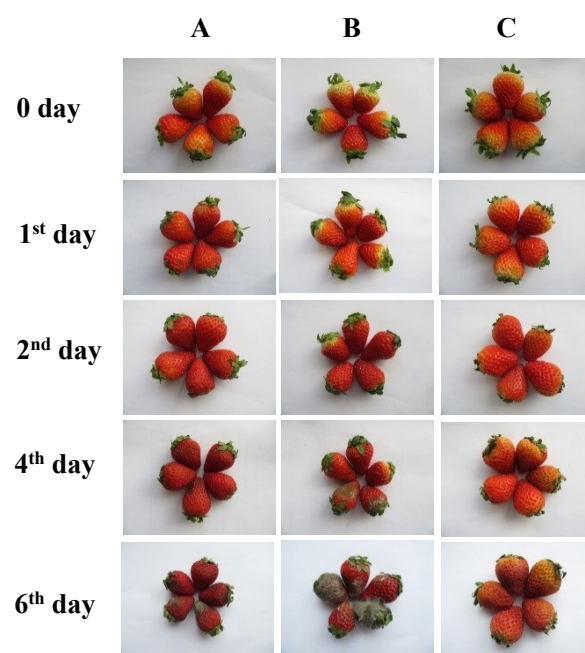

Fig S1 Appearance change of strawberry during storage (A:Control; B: Packed with fresh-keeping film; C: Packed with PVA/ $\beta$ -CD/CEO/LYS nanofilm).
